# Supplementary material for: Mimicking the Biology of Engineered Protein and mRNA Nanoparticle Delivery Using a Versatile Microfluidic Platform
Source: Pharmaceutics. 2021 Nov 17;13(11):1944. doi: 10.3390/pharmaceutics13111944 (PMC8624409; doi:10.3390/pharmaceutics13111944)
Supplement: Supplementary file 1 [file pharmaceutics-13-01944-s001.zip]

Archive with 5 entries (5 files):
- pharmaceutics-1440890-supplementary.pdf
- Video_S1_SK-RC-52 anti-CAIX.avi
- Video_S2_SK-RC-17 anti-CAIX.avi
- Video_S3_SK-RC-52 ZTAQ.avi
- Video_S4_SK-RC-17 ZTAQ.avi
